# Supplementary material for: Enzyme-mediated fast injectable hydrogels based on chitosan–glycolic acid/tyrosine: preparation, characterization, and chondrocyte culture
Source: Royal Society of Chemistry journal article supplement (doi:10.1039/c3py00864a), 2013-08-14
Supplement: c3py00864a.pdf [file c3py00864a.pdf]

## Supporting Information

### Enzyme-Mediated Fast Injectable Hydrogels Based on Chitosan-Glycolic acid/Tyrosine: Preparation, Characterization, and Chondrocyte Culture

Rong Jin<sup>\*a</sup>, Chao Lin<sup>b</sup>, Aoneng Cao<sup>\*a</sup>

<sup>a</sup> *Institute of Nanochemistry and Nanobiology, Shanghai University, Shanghai, 200444, PR. China. Fax: 0086 21 66135275; Tel: 0086 21 66135275. E-mail: r.jin@shu.edu.cn & ancao@shu.edu.cn*

<sup>b</sup> *The Institute for Biomedical Engineering and Nanoscience, Tongji University School of Medicine, Tongji University, Shanghai, 200092, PR. China. Fax: 0086 21 65983706-0; Tel: 0086 21 65983706-803. E-mail: chaolin@tongji.edu.cn*

#### Experimental Section

##### Cell proliferation assay

The analysis of the chondrocyte proliferation was performed using AlamarBlue assay (10×, Invitrogen). In brief, at day 1, 7 and 14, the medium was removed and the cells were washed twice with fresh D-Hanks buffer and incubated with freshly made 1×diluted AlamarBlue solution (in RPMI 1640). After 4 h, 200 μl of the medium solution from each well was transferred to a 96-well plate. The optical density (OD) was measured using a plate reader (Thermo Fisher Scientific) at 570 nm.

##### Cell morphology characterization

The morphology of chondrocytes in tyrosinase-crosslinked CH-GA/Tyr hydrogel was studied using a scanning electron microscopy (SEM). After cultured for 14 days *in vitro*, the cell/gel construct was fixed with formalin and sequential dehydrated. The sample was then dried at a critical point, coated with gold and analyzed with SEM.

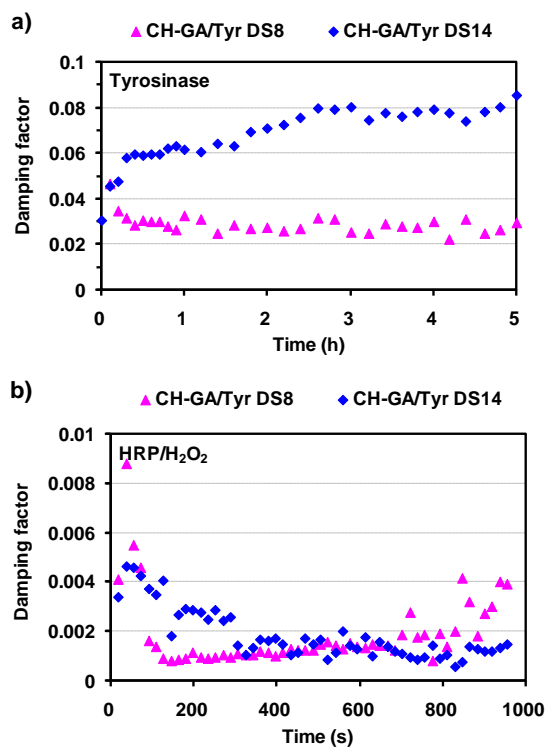

**Figure S1.** Damping factors of injectable 2 wt% CH-GA/Tyr hydrogels crosslinked by (a) tyrosinase or (b) HRP/H<sub>2</sub>O<sub>2</sub>.

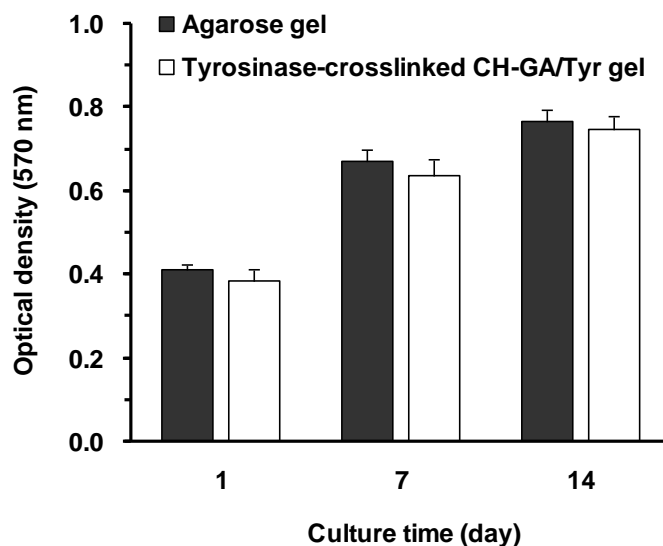

**Figure S2.** AlamarBlue assay showing cell proliferation profile of the chondrocytes as a function of culture time after the cells were encapsulated in the 4 wt% tyrosinase-crosslinked CH-GA/Tyr DS14 hydrogel. Agarose hydrogel was also shown as a positive control.

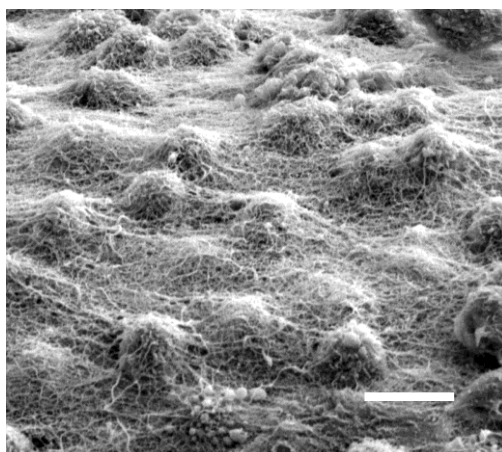

**Figure S3.** SEM image of chondrocytes encapsulated in the 4 wt% tyrosinase-crosslinked CH-GA/Tyr DS14 hydrogel at day 14. Scale bar: 10  $\mu$ m.
